# Supplementary material
Source: Elsevier journal article supplement (https://www.sciencedirect.com/science/article/pii/S1665268122000278)
Supplement: mmc1 [file S1665268122000278:mmc1.docx]

**Supplemental table 1. Demographic characteristics of HCV patients in three cohorts**

|  | **Los Angeles (n=63)** | **Xi’an (n=126)** | **Nanjing (n=67)** |
| --- | --- | --- | --- |
| **Educational background** |  |  |  |
| Below middle school | - | 21.1% | 16.4% |
| Middle or high school | - | 72.5% | 80.6% |
| Undergrade or above | - | 6.4% | 3.0% |
| **Insurance (US cohort)** |  |  |  |
| Governmental insurance/Medicare | 34.9% | - | - |
| HMO | 22.2% | - | - |
| PPO | 31.8% | - | - |
| Other or none | 11.1% | - | - |
| **Insurance (China cohort)** | - | 13.5% | 88.1% |
